# Supplementary material for: The Effects of Passive Simulated Jogging on Short-Term Heart Rate Variability in a Heterogeneous Group of Human Subjects
Source: Hindawi journal article supplement (doi:10.1155/2018/4340925), 2018-10-01
Supplement: f1 [file 4340925.f1.pdf]

Supplementary Information

Figure 1S

CONSORT Flow Diagram

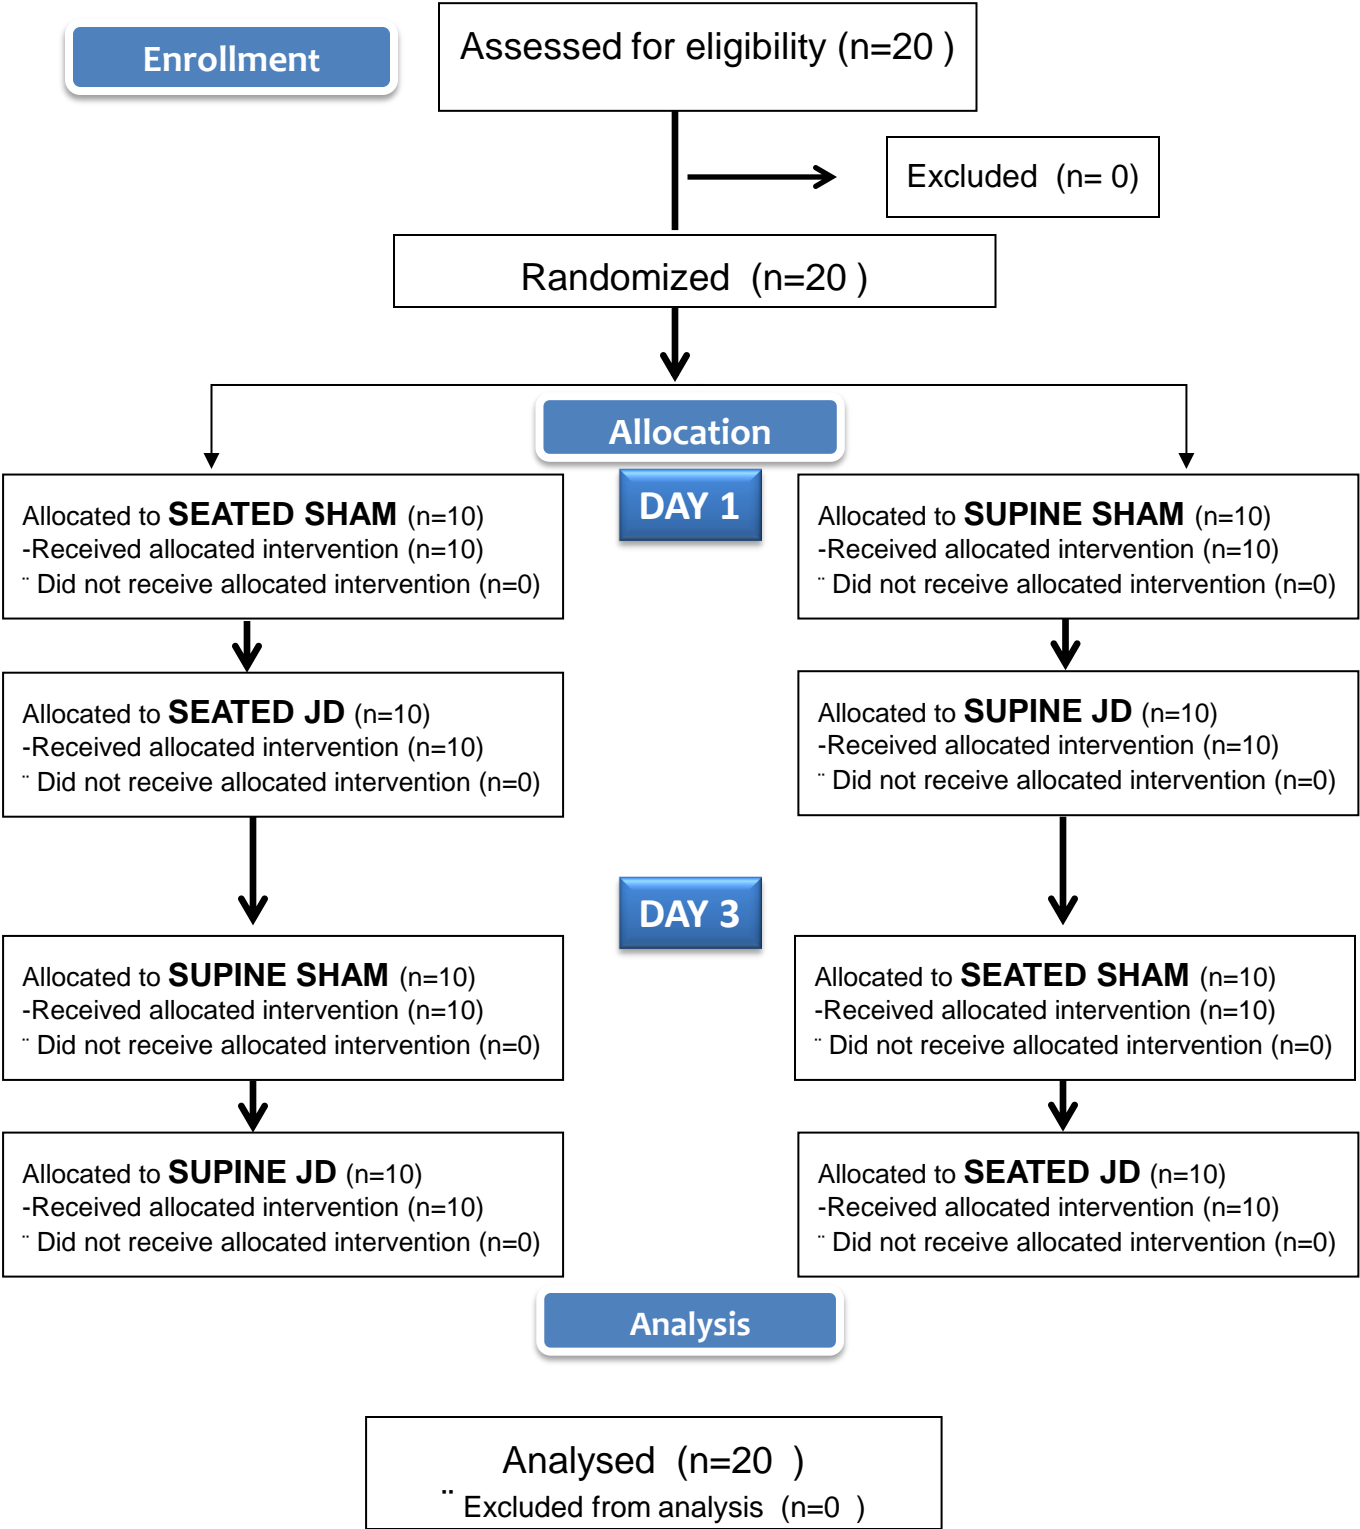

## Supplemental Data

**Table 1S. The effects of age on JD induced changes in HRV**

|                  |     | SEATED   |           |              |             | SUPINE   |           |           |              |
|------------------|-----|----------|-----------|--------------|-------------|----------|-----------|-----------|--------------|
|                  |     | Older    |           | Younger      |             | Older    |           | Younger   |              |
|                  |     | Sham     | JD        | Sham         | JD          | Sham     | JD        | Sham      | JD           |
| Heart Rate (bpm) | BL  | 65(3)    | 67(3)     | 77(4) †      | 71(4)       | 62(3)    | 65(3)     | 73(3) †   | 67(3)        |
|                  | REC | 64(3)    | 68(4)     | 73(6) †      | 70(4)       | 62(3)    | 65(3)     | 74(3) †   | 65(3)        |
| SDNN (ms)        | BL  | 44(6)    | 33(6)     | 39(5)        | 48(8) †     | 50(6)    | 43(6)     | 49(11)    | 55(8)†       |
|                  | REC | 43(4)    | 51(9)* †† | 48(8)        | 68(9)* †††  | 57(6)    | 56(6) ††  | 50(8)     | 92(25)*† ††  |
| RMSSD (ms)       | BL  | 42(7)    | 27(7)*    | 32(8) †      | 46(12) †    | 39(8)    | 35(7)     | 34(8)     | 49(9)†       |
|                  | REC | 35(6)    | 46(11) †† | 21(4) †      | 63(15)* ††† | 44(11)   | 50(10) †† | 39(9)     | 84(27)*† ††  |
| SD1(ms)          | BL  | 29(5)    | 19(5)*    | 15(3) †      | 32(8)* †    | 27(5)    | 25(5)     | 24(6)     | 35(6)* †     |
|                  | REC | 25(4)    | 32(8) ††  | 32(8) †††    | 44(11)* ††† | 31(8)    | 36(7)     | 27(6)     | 60(19)*† ††  |
| SD2(ms)          | BL  | 58(8)    | 43(7)*    | 54(8)        | 58(10) †    | 63(9)    | 54(7)     | 65(15)    | 70(9) †      |
|                  | REC | 54(6)    | 64(11) †† | 53(7)        | 83(10)* ††† | 73(8)    | 68(8) ††  | 64(10)    | 115(30)*† †† |
| LF nu            | BL  | 53(7)    | 51(4)     | 57(7)        | 50(6)       | 44(8)    | 49(6)     | 61(7) †   | 45(5)*       |
|                  | REC | 47(9)    | 56(8)     | 72(5) †††    | 52(6)*      | 60(8)    | 48(7)     | 52(6)     | 53(4)        |
| HF nu            | BL  | 37(5)    | 42(4)     | 32(4)        | 42(5)*      | 41(5)    | 40(4)     | 33(7) †   | 48(5)* †     |
|                  | REC | 39(6)    | 35(6)     | 24(5) †      | 39(5)*      | 30(5)    | 38(4)     | 39(5)     | 38(2)        |
| LF/HF            | BL  | 2.9(1.5) | 1.4(0.4)  | 2.3(0.5)     | 1.9(0.8)    | 2.0(0.9) | 1.5(0.3)  | 3.5(1.4)† | 1.2(0.3)*    |
|                  | REC | 2.6(1.4) | 2.9( 0.9) | 4.8(1.4)† †† | 2.3(1.0)    | 3.3(1.1) | 1.5(0.3)  | 2.5(1.3)  | 1.5(0.2)     |

*Legend:*

The effects of age on HRV parameters in seated and supine postures for Older (subjects >59 yrs ) and Younger ( subjects < 59 yrs). Standard deviation of all normal RR intervals (SDNN), square root of the mean of the sum of the squares of differences between adjacent NN intervals (RMSSD). Poincare parameters of SD1 and SD2, Frequency domain parameters determined using a standard Fast Fourier spectral analysis calculated on the NN time intervals; low-frequency power (LF) , high-frequency power (HF) LF, and HF powers are reported in normalized units ( LFnu, and HFnu) Baseline (BL) and recovery (REC) in seated and supine postures for Sham and JD . †  $p < 0.05$  Older vs. Younger ††  $p < 0.05$  BL vs. REC , \* Sham vs. JD, <sup>a</sup> Seated vs. Supine

## Supplementary Information

Tabel 2 S

| BASELINE TO RECOVERY |      |        |     |  | SDNN  | SD Delta | N RMSSD | SD1   | SD2   | Heart Rate | LF Power | HF Pov | LF/HF |
|----------------------|------|--------|-----|--|-------|----------|---------|-------|-------|------------|----------|--------|-------|
| SUBJECT              | AGE  | TYPE   |     |  |       |          |         |       |       | BPM        | nu       | nu     |       |
| 1 o                  | GJ   | SEATED | BL  |  | 49.1  | 41.9     | 41.8    | 29.7  | 62.7  | 43         | 69       | 31     | 2.2   |
| 1 o                  | GJ   | SEATED | REC |  | 52.6  | 43.3     | 43.2    | 30.6  | 67.8  | 44         | 64       | 36     | 1.8   |
| 1 o                  | GJ   | SUPINE | BL  |  | 72.0  | 58.6     | 58.5    | 41.4  | 93.0  | 45         | 64       | 36     | 1.7   |
| 1 o                  | GJ   | SUPINE | REC |  | 99.5  | 63.8     | 63.7    | 45.1  | 133.3 | 51         | 72       | 27     | 2.7   |
| 1 o                  | SHAM | SEATED | BL  |  | 46.5  | 49.5     | 49.4    | 35.0  | 55.6  | 41         | 54       | 46     | 1.2   |
| 1 o                  | SHAM | SEATED | REC |  | 57.9  | 43.7     | 43.6    | 30.9  | 75.8  | 40         | 56       | 44     | 1.3   |
| 1 o                  | SHAM | SUPINE | BL  |  | 63.7  | 54.9     | 54.8    | 38.8  | 81.2  | 41         | 60       | 40     | 1.5   |
| 1 o                  | SHAM | SUPINE | REC |  | 88.6  | 53.4     | 53.2    | 37.7  | 119.6 | 44         | 73       | 27     | 2.7   |
| 2 y                  | GJ   | SEATED | BL  |  | 25.7  | 19.9     | 19.8    | 14.1  | 33.6  | 58         | 57       | 40     | 1.4   |
| 2 y                  | GJ   | SEATED | REC |  | 37.8  | 25.6     | 25.5    | 18.1  | 50.3  | 60         | 46       | 45     | 1.0   |
| 2 y                  | GJ   | SUPINE | BL  |  | 51.2  | 39.8     | 39.7    | 28.1  | 66.7  | 53         | 53       | 45     | 1.2   |
| 2 y                  | GJ   | SUPINE | REC |  | 46.8  | 30.6     | 30.5    | 21.6  | 62.6  | 54         | 54       | 44     | 1.2   |
| 2 y                  | SHAM | SEATED | BL  |  | 33.4  | 11.4     | 11.4    | 8.1   | 46.6  | 72         | 77       | 18     | 4.3   |
| 2 y                  | SHAM | SEATED | REC |  | 26.7  | 12.9     | 12.8    | 9.1   | 36.7  | 72         | 84       | 11     | 7.7   |
| 2 y                  | SHAM | SUPINE | BL  |  | 32.9  | 25.4     | 25.4    | 18.0  | 43.0  | 64         | 78       | 17     | 4.5   |
| 2 y                  | SHAM | SUPINE | REC |  | 49.5  | 67.4     | 67.3    | 47.7  | 51.2  | 66         | 24       | 48     | 0.5   |
| 3 Y                  | GJ   | SEATED | BL  |  | 42.7  | 34.1     | 34.1    | 24.1  | 55.4  | 65         | 67       | 30     | 2.3   |
| 3 Y                  | GJ   | SEATED | REC |  | 81.8  | 37.6     | 37.6    | 26.6  | 112.6 | 69         | 69       | 27     | 2.5   |
| 3 Y                  | GJ   | SUPINE | BL  |  | 35.8  | 23.7     | 23.6    | 16.7  | 47.8  | 67         | 64       | 31     | 2.0   |
| 3 Y                  | GJ   | SUPINE | REC |  | 48.7  | 29.5     | 29.5    | 20.9  | 65.6  | 65         | 71       | 27     | 2.6   |
| 3 Y                  | SHAM | SEATED | BL  |  | 54.2  | 66.5     | 66.4    | 47.0  | 60.5  | 70         | 32       | 39     | 0.8   |
| 3 Y                  | SHAM | SEATED | REC |  | 41.5  | 30.6     | 30.5    | 21.6  | 54.6  | 71         | 66       | 30     | 2.2   |
| 3 Y                  | SHAM | SUPINE | BL  |  | 43.6  | 29.3     | 29.3    | 20.7  | 58.0  | 69         | 66       | 31     | 2.1   |
| 3 Y                  | SHAM | SUPINE | REC |  | 38.7  | 21.7     | 21.7    | 15.3  | 52.5  | 74         | 48       | 49     | 1.0   |
| 4 o                  | GJ   | SEATED | BL  |  | 37.62 | 29.12    | 29.07   | 20.59 | 49.06 | 55.28      | 58.49    | 40.31  | 1.45  |
| 4 o                  | GJ   | SEATED | REC |  | 73.11 | 87.02    | 86.86   | 61.53 | 83.09 | 56.97      | 28.44    | 56.90  | 0.50  |
| 4 o                  | GJ   | SUPINE | BL  |  | 38.92 | 28.67    | 28.62   | 20.27 | 51.17 | 58.80      | 65.94    | 31.95  | 2.06  |
| 4 o                  | GJ   | SUPINE | REC |  | 40.59 | 50.76    | 50.66   | 35.89 | 44.79 | 48.88      | 34.88    | 64.80  | 0.54  |
| 4 o                  | SHAM | SEATED | BL  |  | 37.56 | 26.26    | 26.22   | 18.57 | 49.77 | 61.68      | 60.41    | 35.24  | 1.71  |

|     |      |        |     |       |        |        |       |        |       |       |       |      |
|-----|------|--------|-----|-------|--------|--------|-------|--------|-------|-------|-------|------|
| 4 o | SHAM | SEATED | REC | 53.64 | 25.24  | 25.20  | 17.85 | 73.73  | 63.73 | 65.87 | 30.13 | 2.19 |
| 4 o | SHAM | SUPINE | BL  | 79.32 | 28.84  | 28.79  | 20.39 | 110.31 | 57.86 | 50.43 | 46.41 | 1.09 |
| 4 o | SHAM | SUPINE | REC | 39.03 | 18.71  | 18.68  | 13.23 | 53.59  | 55.98 | 69.80 | 27.78 | 2.51 |
| 5 y | GJ   | SEATED | BL  | 44.6  | 36.3   | 36.3   | 25.7  | 57.7   | 86.8  | 46.5  | 42.6  | 1.1  |
| 5 y | GJ   | SEATED | REC | 65.5  | 37.1   | 37.0   | 26.2  | 88.8   | 83.7  | 66.6  | 28.4  | 2.3  |
| 5 y | GJ   | SUPINE | BL  | 54.4  | 35.6   | 35.5   | 25.2  | 72.7   | 69.5  | 37.3  | 51.3  | 0.7  |
| 5 y | GJ   | SUPINE | REC | 76.8  | 46.7   | 46.7   | 33.0  | 103.5  | 66.4  | 55.0  | 39.2  | 1.4  |
| 5 y | SHAM | SEATED | BL  | 50.61 | 37.58  | 37.53  | 26.57 | 66.45  | 79.30 | 57.44 | 34.26 | 1.68 |
| 5 y | SHAM | SEATED | REC | 44.46 | 32.35  | 32.31  | 22.87 | 58.56  | 77.70 | 58.02 | 36.76 | 1.58 |
| 5 y | SHAM | SUPINE | BL  | 38.04 | 30.87  | 30.83  | 21.83 | 49.17  | 72.85 | 52.05 | 42.05 | 1.24 |
| 5 y | SHAM | SUPINE | REC | 38.59 | 26.67  | 26.64  | 18.86 | 51.21  | 74.57 | 58.54 | 38.23 | 1.53 |
| 6 o | GJ   | SEATED | BL  | 35.70 | 39.76  | 39.71  | 28.11 | 41.93  | 76.72 | 33.30 | 34.12 | 0.98 |
| 6 o | GJ   | SEATED | REC | 67.19 | 71.98  | 71.89  | 50.90 | 80.24  | 81.96 | 27.42 | 32.62 | 0.84 |
| 6 o | GJ   | SUPINE | BL  | 47.48 | 71.41  | 71.32  | 50.50 | 44.25  | 77.96 | 8.22  | 26.55 | 0.31 |
| 6 o | GJ   | SUPINE | REC | 69.57 | 107.48 | 107.34 | 76.00 | 62.47  | 76.92 | 8.53  | 31.04 | 0.27 |
| 6 o | SHAM | SEATED | BL  | 40.48 | 41.47  | 41.42  | 29.33 | 49.17  | 71.70 | 48.43 | 47.06 | 1.03 |
| 6 o | SHAM | SEATED | REC | 49.96 | 42.60  | 42.54  | 30.12 | 63.91  | 71.36 | 27.65 | 58.26 | 0.47 |
| 6 o | SHAM | SUPINE | BL  | 58.21 | 44.56  | 44.49  | 31.51 | 76.05  | 68.50 | 36.74 | 37.41 | 0.98 |
| 6 o | SHAM | SUPINE | REC | 76.84 | 46.48  | 46.41  | 32.87 | 103.58 | 65.21 | 58.80 | 28.15 | 2.09 |
| 7 y | GJ   | SEATED | BL  | 11.72 | 10.09  | 10.07  | 7.13  | 14.96  | 88.45 | 44.37 | 42.80 | 1.04 |
| 7 y | GJ   | SEATED | REC | 40.39 | 28.88  | 28.84  | 20.42 | 53.35  | 80.51 | 51.90 | 38.82 | 1.34 |
| 7 y | GJ   | SUPINE | BL  | 52.56 | 48.50  | 48.44  | 34.29 | 65.95  | 81.43 | 21.13 | 66.84 | 0.32 |
| 7 y | GJ   | SUPINE | REC | 57.81 | 51.29  | 51.22  | 36.27 | 73.28  | 73.12 | 42.18 | 46.06 | 0.92 |
| 7 y | SHAM | SEATED | BL  | 15.48 | 6.58   | 6.58   | 4.66  | 21.39  | 97.13 | 61.64 | 31.17 | 1.98 |
| 7 y | SHAM | SEATED | REC | 35.87 | 8.34   | 8.33   | 5.90  | 50.39  | 90.50 | 72.67 | 23.81 | 3.05 |
| 7 y | SHAM | SUPINE | BL  | 29.71 | 20.71  | 20.68  | 14.64 | 39.38  | 76.50 | 69.91 | 20.87 | 3.35 |
| 7 y | SHAM | SUPINE | REC | 24.83 | 11.50  | 11.48  | 8.13  | 34.16  | 80.00 | 63.19 | 32.23 | 1.96 |
| 8 y | GJ   | SEATED | BL  | 45.58 | 42.79  | 42.73  | 30.26 | 56.92  | 68.45 | 16.45 | 77.16 | 0.21 |
| 8 y | GJ   | SEATED | REC | 70.97 | 62.04  | 61.95  | 43.87 | 90.27  | 67.88 | 51.05 | 37.20 | 1.37 |
| 8 y | GJ   | SUPINE | BL  | 41.94 | 46.38  | 46.31  | 32.80 | 49.42  | 66.34 | 18.66 | 76.48 | 0.24 |
| 8 y | GJ   | SUPINE | REC | 71.44 | 45.51  | 45.45  | 32.18 | 95.76  | 71.23 | 55.36 | 38.46 | 1.44 |
| 8 y | SHAM | SEATED | BL  | 37.77 | 20.82  | 20.80  | 14.72 | 51.35  | 84.61 | 41.65 | 53.40 | 0.78 |
| 8 y | SHAM | SEATED | REC | 37.59 | 21.14  | 21.12  | 14.95 | 51.02  | 88.56 | 45.37 | 48.88 | 0.93 |
| 8 y | SHAM | SUPINE | BL  | 38.31 | 30.44  | 30.40  | 21.52 | 49.72  | 81.66 | 26.69 | 66.47 | 0.40 |

|      |      |        |     |        |        |        |        |        |       |       |       |       |
|------|------|--------|-----|--------|--------|--------|--------|--------|-------|-------|-------|-------|
| 8 y  | SHAM | SUPINE | REC | 45.11  | 36.80  | 36.76  | 26.02  | 58.24  | 78.71 | 42.61 | 50.47 | 0.84  |
| 9 o  | GJ   | SEATED | BL  | 20.88  | 16.13  | 16.10  | 11.40  | 27.24  | 61.46 | 47.71 | 50.51 | 0.94  |
| 9 o  | GJ   | SEATED | REC | 27.34  | 14.25  | 14.22  | 10.07  | 37.33  | 65.40 | 73.40 | 25.08 | 2.93  |
| 9 o  | GJ   | SUPINE | BL  | 28.40  | 18.24  | 18.21  | 12.90  | 38.04  | 61.28 | 70.26 | 26.49 | 2.65  |
| 9 o  | GJ   | SUPINE | REC | 36.80  | 17.50  | 17.47  | 12.38  | 50.54  | 60.84 | 62.94 | 35.67 | 1.76  |
| 9 o  | SHAM | SEATED | BL  | 86.93  | 64.45  | 64.36  | 45.58  | 114.17 | 70.18 | 33.91 | 41.14 | 0.82  |
| 9 o  | SHAM | SEATED | REC | 37.96  | 22.97  | 22.93  | 16.24  | 51.16  | 63.11 | 44.49 | 53.18 | 0.84  |
| 9 o  | SHAM | SUPINE | BL  | 41.02  | 67.81  | 67.70  | 47.95  | 32.65  | 61.75 | 4.80  | 57.40 | 0.08  |
| 9 o  | SHAM | SUPINE | REC | 75.99  | 116.78 | 116.58 | 82.58  | 68.78  | 59.24 | 14.39 | 55.56 | 0.26  |
| 10 o | GJ   | SEATED | BL  | 12.70  | 5.12   | 5.12   | 3.62   | 17.60  | 81.96 | 72.87 | 22.84 | 3.19  |
| 10 o | GJ   | SEATED | REC | 21.43  | 4.80   | 4.80   | 3.40   | 30.11  | 80.97 | 84.68 | 13.50 | 6.27  |
| 10 o | GJ   | SUPINE | BL  | 28.14  | 15.63  | 15.61  | 11.05  | 38.23  | 70.42 | 38.25 | 55.84 | 0.69  |
| 10 o | GJ   | SUPINE | REC | 36.19  | 11.34  | 11.33  | 8.02   | 50.55  | 75.89 | 57.26 | 39.45 | 1.45  |
| 10 o | SHAM | SEATED | BL  | 16.60  | 3.39   | 3.39   | 2.40   | 23.35  | 79.60 | 90.83 | 5.74  | 15.82 |
| 10 o | SHAM | SEATED | REC | 26.94  | 4.23   | 4.23   | 2.99   | 37.98  | 81.13 | 92.15 | 6.48  | 14.22 |
| 10 o | SHAM | SUPINE | BL  | 28.39  | 13.85  | 13.83  | 9.80   | 38.94  | 70.95 | 89.82 | 9.41  | 9.54  |
| 10 o | SHAM | SUPINE | REC | 32.17  | 14.26  | 14.24  | 10.08  | 44.37  | 70.31 | 85.30 | 13.51 | 6.31  |
| 11 o | GJ   | SEATED | BL  | 12.46  | 5.51   | 5.50   | 3.90   | 17.19  | 82.01 | 68.65 | 26.38 | 2.60  |
| 11 o | GJ   | SEATED | REC | 23.77  | 4.25   | 4.24   | 3.00   | 33.49  | 82.11 | 82.74 | 14.65 | 5.65  |
| 11 o | GJ   | SUPINE | BL  | 28.15  | 15.70  | 15.68  | 11.10  | 38.23  | 70.40 | 38.06 | 56.06 | 0.68  |
| 11 o | GJ   | SUPINE | REC | 37.83  | 13.30  | 13.28  | 9.40   | 52.67  | 76.55 | 68.82 | 28.21 | 2.44  |
| 11 o | SHAM | SEATED | BL  | 57.87  | 83.05  | 82.91  | 58.73  | 56.99  | 58.25 | 21.82 | 58.36 | 0.37  |
| 11 o | SHAM | SEATED | REC | 30.75  | 48.33  | 48.25  | 34.18  | 26.88  | 59.20 | 8.97  | 51.84 | 0.17  |
| 11 o | SHAM | SUPINE | BL  | 63.99  | 77.21  | 77.08  | 54.60  | 72.17  | 60.12 | 28.98 | 54.26 | 0.53  |
| 11 o | SHAM | SUPINE | REC | 66.68  | 71.08  | 70.96  | 50.26  | 79.79  | 63.50 | 35.72 | 43.10 | 0.83  |
| 12 y | GJ   | SEATED | BL  | 75.35  | 56.90  | 56.80  | 40.23  | 98.68  | 59.22 | 49.04 | 43.59 | 1.13  |
| 12 y | GJ   | SEATED | REC | 74.78  | 74.39  | 74.24  | 52.60  | 91.75  | 49.79 | 49.26 | 50.59 | 0.97  |
| 12 y | GJ   | SUPINE | BL  | 103.70 | 106.68 | 106.50 | 75.44  | 125.76 | 58.03 | 38.88 | 58.43 | 0.67  |
| 12 y | GJ   | SUPINE | REC | 308.93 | 311.68 | 311.16 | 220.39 | 377.23 | 59.73 | 54.15 | 25.61 | 2.11  |
| 12 y | SHAM | SEATED | BL  | 82.34  | 51.28  | 51.20  | 36.26  | 110.66 | 58.92 | 75.42 | 22.08 | 3.42  |
| 12 y | SHAM | SEATED | REC | 74.14  | 38.02  | 37.97  | 26.88  | 101.35 | 63.91 | 75.18 | 21.70 | 3.46  |
| 12 y | SHAM | SUPINE | BL  | 130.86 | 87.07  | 86.90  | 61.57  | 174.52 | 54.47 | 28.73 | 59.76 | 0.48  |
| 12 y | SHAM | SUPINE | REC | 105.78 | 86.50  | 86.35  | 61.17  | 136.52 | 57.48 | 51.54 | 39.30 | 1.31  |
| 13 o | GJ   | SEATED | BL  | 26.64  | 17.81  | 17.79  | 12.60  | 35.51  | 69.90 | 53.70 | 39.42 | 1.36  |

|      |      |        |     |       |       |       |       |       |       |       |       |       |
|------|------|--------|-----|-------|-------|-------|-------|-------|-------|-------|-------|-------|
| 13 o | GJ   | SEATED | REC | 34.36 | 9.92  | 9.91  | 7.02  | 48.08 | 80.39 | 88.08 | 9.28  | 9.49  |
| 13 o | GJ   | SUPINE | BL  | 21.65 | 12.05 | 12.03 | 8.52  | 29.41 | 70.63 | 57.90 | 34.10 | 1.70  |
| 13 o | GJ   | SUPINE | REC | 58.04 | 65.60 | 65.51 | 46.39 | 67.72 | 72.68 | 44.45 | 35.16 | 1.26  |
| 13 o | SHAM | SEATED | BL  | 27.25 | 24.78 | 24.75 | 17.52 | 34.33 | 69.80 | 46.63 | 35.49 | 1.31  |
| 13 o | SHAM | SEATED | REC | 51.89 | 71.27 | 71.17 | 50.40 | 53.35 | 69.29 | 11.73 | 65.98 | 0.18  |
| 13 o | SHAM | SUPINE | BL  | 15.58 | 12.17 | 12.16 | 8.61  | 20.28 | 71.70 | 35.72 | 57.51 | 0.62  |
| 13 o | SHAM | SUPINE | REC | 47.26 | 14.76 | 14.74 | 10.44 | 66.01 | 73.15 | 90.31 | 8.00  | 11.29 |
| 14 Y | GJ   | SEATED | BL  | 29.38 | 11.65 | 11.64 | 8.24  | 40.72 | 79.60 | 84.29 | 9.48  | 8.89  |
| 14 Y | GJ   | SEATED | REC | 32.91 | 11.59 | 11.57 | 8.19  | 45.81 | 82.96 | 90.60 | 8.04  | 11.27 |
| 14 Y | GJ   | SUPINE | BL  | 18.22 | 12.45 | 12.43 | 8.80  | 24.22 | 78.73 | 64.85 | 22.78 | 2.85  |
| 14 Y | GJ   | SUPINE | REC | 55.99 | 77.95 | 77.85 | 55.12 | 56.85 | 77.60 | 25.39 | 39.05 | 0.65  |
| 14 Y | SHAM | SEATED | BL  | 23.10 | 9.09  | 9.08  | 6.43  | 32.03 | 88.57 | 78.20 | 15.62 | 5.01  |
| 14 Y | SHAM | SEATED | REC | 24.40 | 9.34  | 9.32  | 6.60  | 33.87 | 84.85 | 88.31 | 7.87  | 11.22 |
| 14 Y | SHAM | SUPINE | BL  | 21.02 | 10.56 | 10.55 | 7.47  | 28.77 | 89.43 | 72.59 | 17.81 | 4.07  |
| 14 Y | SHAM | SUPINE | REC | 29.68 | 22.58 | 22.56 | 15.97 | 38.82 | 84.32 | 56.34 | 27.49 | 2.05  |
| 15 o | GJ   | SEATED | BL  | 31.99 | 23.33 | 23.29 | 16.50 | 42.12 | 59.32 | 37.98 | 57.22 | 0.66  |
| 15 o | GJ   | SEATED | REC | 43.69 | 30.58 | 30.53 | 21.63 | 57.87 | 56.03 | 76.19 | 22.82 | 3.34  |
| 15 o | GJ   | SUPINE | BL  | 39.94 | 26.07 | 26.02 | 18.43 | 53.39 | 54.20 | 64.39 | 33.41 | 1.93  |
| 15 o | GJ   | SUPINE | REC | 54.18 | 34.30 | 34.24 | 24.26 | 72.68 | 52.70 | 63.90 | 33.70 | 1.90  |
| 15 o | SHAM | SEATED | BL  | 42.93 | 25.01 | 24.97 | 17.69 | 58.08 | 60.03 | 79.43 | 18.32 | 4.33  |
| 15 o | SHAM | SEATED | REC | 51.23 | 28.59 | 28.54 | 20.22 | 69.57 | 56.60 | 66.18 | 31.23 | 2.12  |
| 15 o | SHAM | SUPINE | BL  | 44.12 | 16.04 | 16.02 | 11.34 | 61.36 | 60.13 | 77.19 | 19.60 | 3.94  |
| 15 o | SHAM | SUPINE | REC | 57.42 | 25.18 | 25.13 | 17.80 | 79.24 | 50.91 | 61.09 | 37.43 | 1.63  |
| 16 o | GJ   | SEATED | BL  | 24.86 | 8.27  | 8.26  | 5.85  | 34.67 | 71.59 | 51.72 | 46.38 | 1.12  |
| 16 o | GJ   | SEATED | REC | 52.42 | 58.22 | 58.14 | 41.17 | 61.65 | 70.86 | 23.42 | 67.25 | 0.35  |
| 16 o | GJ   | SUPINE | BL  | 24.21 | 16.26 | 16.23 | 11.49 | 32.25 | 61.42 | 72.01 | 25.01 | 2.88  |
| 16 o | GJ   | SUPINE | REC | 40.61 | 24.23 | 24.19 | 17.13 | 54.81 | 63.61 | 70.74 | 26.40 | 2.68  |
| 16 o | SHAM | SEATED | BL  | 38.0  | 57.6  | 57.5  | 40.8  | 35.1  | 65.8  | 33.0  | 47.7  | 0.7   |
| 16 o | SHAM | SEATED | REC | 29.6  | 42.4  | 42.3  | 30.0  | 29.1  | 72.1  | 13.0  | 33.2  | 0.4   |
| 16 o | SHAM | SUPINE | BL  | 34.7  | 18.4  | 18.4  | 13.0  | 47.3  | 66.7  | 24.7  | 37.7  | 0.7   |
| 16 o | SHAM | SUPINE | REC | 27.4  | 15.1  | 15.0  | 10.6  | 37.3  | 63.9  | 81.7  | 16.9  | 4.8   |
| 17 o | GJ   | SEATED | BL  | 34.59 | 26.85 | 26.81 | 18.99 | 45.08 | 62.61 | 36.01 | 57.53 | 0.63  |
| 17 o | GJ   | SEATED | REC | 43.01 | 55.77 | 55.68 | 39.43 | 46.32 | 60.33 | 25.66 | 60.72 | 0.42  |
| 17 o | GJ   | SUPINE | BL  | 77.21 | 65.37 | 65.27 | 46.23 | 98.92 | 62.44 | 24.53 | 69.84 | 0.35  |

|      |      |        |     |        |        |        |        |        |       |       |       |       |
|------|------|--------|-----|--------|--------|--------|--------|--------|-------|-------|-------|-------|
| 17 o | GJ   | SUPINE | REC | 64.67  | 83.91  | 83.79  | 59.34  | 69.60  | 67.97 | 14.00 | 39.35 | 0.36  |
| 17 o | SHAM | SEATED | BL  | 51.01  | 41.23  | 41.18  | 29.16  | 65.99  | 72.18 | 57.11 | 34.94 | 1.63  |
| 17 o | SHAM | SEATED | REC | 42.56  | 17.66  | 17.63  | 12.49  | 58.87  | 68.38 | 79.90 | 17.61 | 4.54  |
| 17 o | SHAM | SUPINE | BL  | 67.95  | 52.69  | 52.61  | 37.26  | 88.58  | 64.96 | 32.71 | 48.06 | 0.68  |
| 17 o | SHAM | SUPINE | REC | 62.10  | 68.34  | 68.24  | 48.32  | 73.33  | 72.22 | 32.89 | 42.28 | 0.78  |
| 18 y | GJ   | SEATED | BL  | 39.90  | 30.28  | 30.23  | 21.41  | 52.20  | 56.60 | 52.37 | 44.76 | 1.17  |
| 18 y | GJ   | SEATED | REC | 72.30  | 87.05  | 86.90  | 61.56  | 81.64  | 56.91 | 26.06 | 58.76 | 0.44  |
| 18 y | GJ   | SUPINE | BL  | 38.76  | 28.70  | 28.65  | 20.29  | 50.93  | 58.79 | 66.00 | 31.90 | 2.07  |
| 18 y | GJ   | SUPINE | REC | 54.20  | 37.05  | 36.98  | 26.20  | 72.04  | 50.83 | 66.21 | 33.30 | 1.99  |
| 18 y | SHAM | SEATED | BL  | 49.11  | 61.55  | 61.47  | 43.52  | 54.12  | 74.41 | 21.24 | 43.03 | 0.49  |
| 18 y | SHAM | SEATED | REC | 35.58  | 14.64  | 14.62  | 10.35  | 49.25  | 73.06 | 90.28 | 8.08  | 11.17 |
| 18 y | SHAM | SUPINE | BL  | 39.59  | 13.37  | 13.35  | 9.45   | 55.18  | 74.82 | 92.45 | 6.80  | 13.60 |
| 18 y | SHAM | SUPINE | REC | 51.23  | 17.35  | 17.33  | 12.27  | 71.40  | 78.03 | 91.81 | 7.31  | 12.56 |
| 19 y | SHAM | SEATED | BL  | 33.46  | 20.27  | 20.24  | 14.33  | 45.10  | 65.06 | 67.88 | 30.18 | 2.25  |
| 19 y | SHAM | SEATED | REC | 32.83  | 21.38  | 21.35  | 15.12  | 43.90  | 65.71 | 67.10 | 29.84 | 2.25  |
| 19 y | SHAM | SUPINE | BL  | 68.66  | 59.02  | 58.94  | 41.73  | 87.68  | 70.47 | 61.41 | 32.29 | 1.90  |
| 19 y | SHAM | SUPINE | REC | 64.07  | 58.99  | 58.90  | 41.71  | 80.44  | 70.26 | 34.46 | 56.32 | 0.61  |
| 20 Y | GJ   | Supine | BL  | 70.0   | 64.4   | 64.3   | 45.5   | 87.9   | 77.5  | 43.8  | 45.5  | 1.0   |
| 20 Y | GJ   | Supine | REC | 107.3  | 109.0  | 108.9  | 77.1   | 130.8  | 74.5  | 47.3  | 41.7  | 1.1   |
| 20 Y | GJ   | SEATED | BL  | 57.5   | 87.3   | 87.2   | 61.7   | 52.9   | 88.7  | 49.8  | 41.4  | 1.2   |
| 20 Y | GJ   | SEATED | REC | 67.6   | 92.8   | 92.7   | 65.6   | 69.5   | 77.4  | 23.5  | 56.4  | 0.4   |
| 21 y | GJ   | SEATED | BL  | 106.62 | 127.09 | 126.89 | 89.87  | 121.07 | 64.77 | 36.64 | 49.72 | 0.74  |
| 21 y | GJ   | SEATED | REC | 132.80 | 171.96 | 171.70 | 121.60 | 143.14 | 68.20 | 42.12 | 42.17 | 1.00  |
| 21 y | GJ   | SUPINE | BL  | 84.57  | 82.20  | 82.05  | 58.12  | 104.53 | 58.11 | 42.63 | 52.60 | 0.81  |
| 21 y | GJ   | SUPINE | REC | 97.76  | 106.63 | 106.43 | 75.40  | 115.88 | 54.99 | 55.96 | 41.78 | 1.34  |
| 22 o | GJ   | SEATED | BL  | 79.62  | 82.70  | 82.58  | 58.48  | 96.23  | 68.86 | 33.54 | 55.18 | 0.61  |
| 22 o | GJ   | SEATED | REC | 127.63 | 122.38 | 122.20 | 86.54  | 158.41 | 71.53 | 38.73 | 44.67 | 0.87  |
| 22 o | GJ   | SUPINE | BL  | 63.61  | 56.61  | 56.54  | 40.03  | 80.55  | 81.59 | 41.57 | 43.34 | 0.96  |
| 22 o | GJ   | SUPINE | REC | 75.36  | 82.15  | 82.03  | 58.09  | 89.35  | 72.48 | 33.72 | 53.64 | 0.63  |
